## **Genozip Dual-Coordinate VCF format enables efficient genomic analyses and alleviates liftover limitations**

Divon Lan<sup>1,\*</sup>, Gludhug Purnomo<sup>1,2</sup>, Ray Tobler<sup>1,2,3,†</sup>, Yassine Souilmi<sup>1,4,†</sup>, Bastien Llamas<sup>1,2,4,5,†,\*</sup>

<sup>1</sup> Australian Centre for Ancient DNA, School of Biological Sciences, The Environment Institute, Faculty of Sciences, The University of Adelaide, Adelaide SA 5005, Australia

<sup>2</sup> Centre of Excellence for Australian Biodiversity and Heritage (CABAH), School of Biological Sciences, University of Adelaide, Adelaide, SA 5005, Australia

<sup>3</sup> Evolution of Cultural Diversity Initiative, Australian National University, College of Asia and the Pacific, Canberra, ACT 0200, Australia

<sup>4</sup> National Centre for Indigenous Genomics, Australian National University, Canberra, ACT 0200, Australia

<sup>5</sup> Indigenous Genomics Research Group, Telethon Kids Institute, Adelaide, SA 5000, Australia

† Equal contribution

\* Correspondence: DL ([divon@genozip.com](mailto:divon@genozip.com)) and BL ([bastien.llamas@adelaide.edu.au](mailto:bastien.llamas@adelaide.edu.au))

## Abstract

We introduce Dual Coordinate VCF (DVCF), a file format that records genomic variants against two different reference genomes simultaneously and is fully compliant with the current VCF specification. As implemented in the Genozip platform, DVCF enables bioinformatics pipelines to seamlessly operate across two coordinate systems by leveraging the system most advantageous to each pipeline step, simplifying bioinformatics workflows and reducing file generation and associated data storage burden. Moreover, our benchmarking of Genozip DVCF shows that it produces more complete, less erroneous, and less biased translations across coordinate systems than two widely used alternative tools (i.e., LiftoverVcf and CrossMap).

Availability and Implementation: Genozip is free for academic use. Documentation is available on <https://genozip.com/dvcf.html>. Genozip user manual is available on <https://genozip.com/manual.html>. The source code is available on <https://genozip.com/source.html>. The scripts for reproducing the benchmarks are available on <https://github.com/divonlan/genozip-dvcf-results>.

## Main

Genomic sequencing and assembly technologies continue to evolve at a rapid pace, enabling the creation of new and more accurate reference genomes for various species [1]. While improved human reference genomes are welcomed by researchers and clinicians, updated assemblies inevitably result in altered coordinates that can hinder their adoption as it is common that legacy datasets and bioinformatics software required for some analyses often still use the older coordinate system. Accordingly, for species such as humans where multiple reference genomes (or versions thereof) are available, analytical pipelines often need to alternate between two coordinate systems to accommodate these limitations.

To facilitate workflows involving data mapped against different reference genomes, software such as CrossMap [2] and GATK LiftoverVcf [3] translate genomic coordinates across the assemblies using a chain file [4]. Variants, typically encoded in a VCF (Variant Call Format) [5] file, are then lifted over from one coordinate system to the other, resulting in file duplication (i.e., one for each coordinate system). The liftover step is typically lossy, with variants discarded due their coordinates lacking alignment in the chain file as well as limitations of the liftover software used [1, 6]. Moreover, errors may be introduced due to incorrect chain file mapping of variants as well as incorrect annotation conversion, along with the introduction of potential biases due to the concentration of discarded variants in certain genomic regions.

Here we introduce an implementation of the *Dual Coordinate VCF* (DVCF) [7] format in the Genozip platform [8, 9], an extensible compression software. DVCF is an extension to the standard VCF format compliant with the VCF 4.3 specification, that includes variants with coordinates pertaining to two different genome assemblies simultaneously (Fig. S1). Using DVCF files, researchers can alternate between coordinate systems according to their needs – without creating duplicate VCF files – thereby reducing workflow complexity and alleviating demands on time, computational resources, and disk storage burden (the latter being further improved by Genozip's efficient data compression algorithms; Tables S16-17). Importantly, the DVCF file format is independent of its implementation in Genozip, allowing its

implementation in any relevant bioinformatics software, thereby maintaining interoperability between tools.

We refer to the process of converting a VCF file to the DVCF format as *lifting*. In order to lift a VCF file to DVCF, Genozip requires three inputs: two reference files – one defining the *Primary* coordinates as used in the input VCF, and the other defining the *Luft* coordinates to be lifted over (“*luft*” is a neologism representing an alternative past-participle of “lift”) – and a chain file defining alignments between the two reference assemblies. Once a DVCF file is generated, users can render it in either *Primary* or *Luft* coordinates by using Genozip’s `genocat` command (see Figs. 1A, S2). *Cross-rendering* consists of losslessly re-arranging the information in the DVCF file to change the coordinate system in which the variants are represented. This allows users to seamlessly alternate between coordinate systems according to the particulars of their bioinformatic workflow.

While a DVCF has two possible renditions (*Primary* and *Luft*), the DVCF file format is carefully designed so that the information contained in each rendition is identical, thereby guaranteeing that the *cross-rendering* process is strictly lossless and invertible. Variants or annotations that have representation in only one of the two coordinate systems due to the lack of a chain file alignment or limitations of the lifting algorithm are nevertheless still represented in both DVCF *renditions*. The missing variants and annotations are stored in VCF header lines and certain INFO annotations, respectively, as defined in the DVCF specification (sections 5,6,7 in the specification [7]). Since the DVCF file format complies with the VCF standard, any tool that works with VCF files will also work with DVCF files. In addition to rendering the complete VCF data, Genozip’s `genocat` command allows users to render specific subsets of data in either coordinate system, as well as perform a wide variety of downsampling and filtering procedures, by drawing upon Genozip’s internal indexing facility (see the `genocat` user manual).

To compare the performance of Genozip DVCF against two widely used liftover tools, i.e., LiftoverVcf and CrossMap, we conducted a series of benchmarks using publicly available human genomic data (Supplementary Information section 2). For each file tested, we used the same chain file with all three tools, but nevertheless, each of the three tools produced a different lifted VCF file. We systematically investigated the differences in the lifted files produced by the three tools, characterising and enumerating errors and biases that result from underlying deficiencies in the algorithms of each liftover tool. In other words, we did not evaluate the correctness of the chain files, but rather the correctness of the lifting algorithms for any given chain file.

Genozip outperformed both incumbent tools when lifting a set ~19,000 indels, or ~4.1 million SNPs from an older version of the human reference (i.e., GRCh37) to the most recent version (i.e., GRCh38), reducing the proportion of incorrect calls by nine-fold for indels (0.2% vs 2.1–2.3%) and 463-fold for SNPs (0.002% vs 1.1%) (Fig. 1B, Tables S1-11). Notably, CrossMap also dropped all instances of SNPs where the reference and alternate alleles had been switched between the two reference versions (i.e., REF $\rightleftharpoons$ ALT switches, which accounted for 0.7% of all 4.1M SNPs), which may introduce biases into downstream analyses that leverage SNP diversity patterns due to the highly non-uniform genomic distribution of the REF $\rightleftharpoons$ ALT switches (Figs. 1C, S3-4). We also applied the three tools to ~970k million clinically relevant variants obtained from the ClinVar website [10] and identified multiple cases of data corruption introduced by CrossMap and LiftoverVcf, which included

known pathogenic variants, that are entirely absent from Genozip DVCF (Fig. 1D; Tables S13-15).

In conclusion, the implementation of DVCF within the Genozip software platform provides researchers with a user-friendly and flexible tool that facilitates the construction of bioinformatic pipelines capable of working across dual coordinate systems. This is essential whenever researchers wish to exploit the advantages of working with sequence data aligned to the latest version of the reference genome, while still being able to draw upon abundant legacy data or tools that use an older reference genome version.

Genozip DVCF also correctly lifts more variants and eliminates key errors identified in our benchmarks of two widely used liftover tools, CrossMap and LiftoverVcf. Failure of these latter tools to correctly liftover variants in regions of the genome causally associated with phenotypes (Fig. 1D) could negatively impact genetic analyses that rely on regional genomic signals—such as genomic scans for disease-associated and/or selected variants. Moreover, liftover errors have documented impacts on variant effect interpretation [6], which could result in important clinically significant variants being overlooked or leading to misdiagnoses [1].

Overall, DVCF represents a new and fundamentally different approach for working concurrently within coordinate systems from two different genome assemblies—a reality that many genomics researchers will likely face as improved sequencing technologies lead to increasingly complete reference genomes [1]—greatly simplifying bioinformatic workflows without compromising the robustness of downstream analytical results. Importantly, Genozip's extensible framework means that further improving DVCF functionality (e.g., by including new algorithms to handle liftover errors, or supporting an arbitrary number of reference genomes, thereby enabling recording of homologous genes in different species) will be an active area of future research.

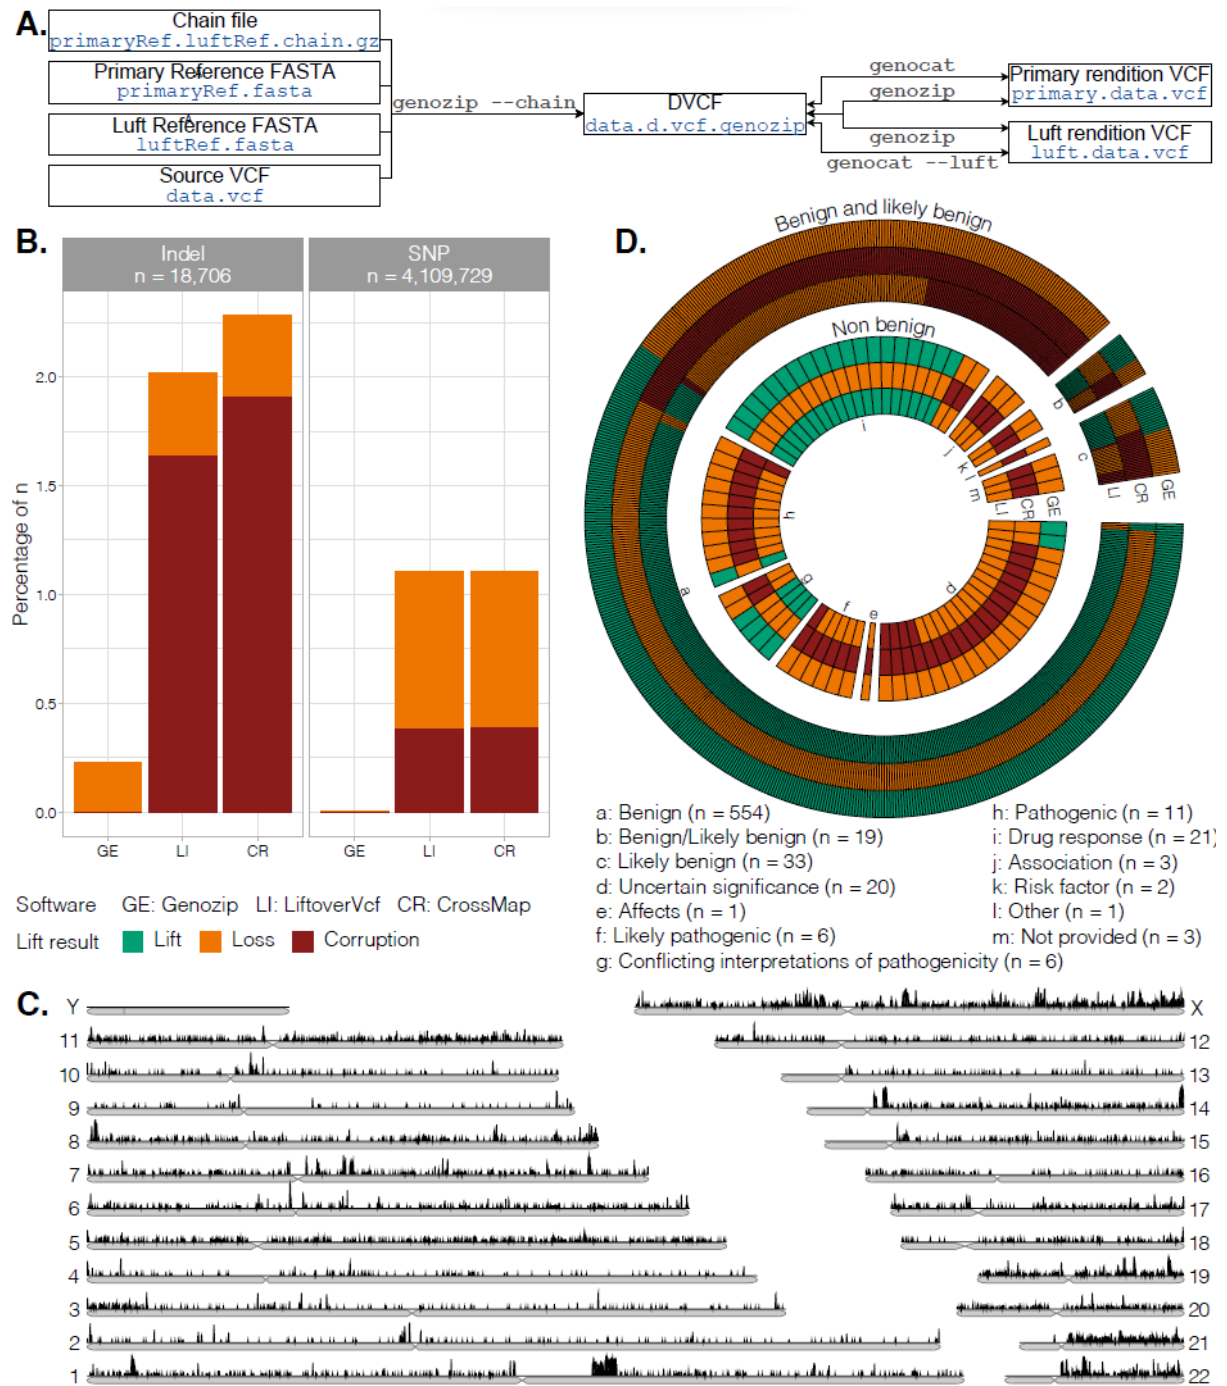

**Figure 1.** DVCF command line usage and performance vs. CrossMap and LiftoverVcf. **A.** Generation of primary (*Primary*) and alternate (*Luft*) renditions and their integration into a bioinformatics pipeline. Commands are shown along the connecting arrows and file names are indicated in blue text. File suffixes are automatically generated by genozip. **B.** When lifting ~4.1M SNPs and ~19k indels from GRCh37 to GRCh38 (right and left subpanels, respectively), Genozip DVCF results in substantially fewer lost variants (orange bar portions) and eradicates all forms of data corruption (red bar portions) (see Tables S1 & S9). **C.** Genomic distribution of the ~30k SNPs (from a set of ~4.1M SNPs) where the reference and alternative allele are switched (i.e. REF $\rightleftharpoons$ ALT allele switches) between human reference GRCh37 and GRCh38. While Genozip DVCF correctly lifted all ~30k SNPs, CrossMap drops these variants (see Table S9), which may lead to biases in downstream analyses due to the genomic clustering of REF $\rightleftharpoons$ ALT allele switches. **D.** Similar results are observed when lifting a set ~970k variants with clinical annotations from GRCh37 to GRCh38, with CrossMap and LiftoverVcf

producing many more dropped variants (orange blocks) than Genozip DVCF and also generating multiple corrupted variants (red blocks) – including pathogenic and likely pathogenic cases (see associated key) – that are entirely absent from Genozip DVCF (see tables S13-15).

## References

1. Aganezov S, Yan SM, Soto DC, Kirsche M, Zarate S, Avdeyev P, et al. A complete reference genome improves analysis of human genetic variation. *bioRxiv*. 2021;:2021.07.12.452063.
2. Zhao H, Sun Z, Wang J, Huang H, Kocher J-P, Wang L. CrossMap: a versatile tool for coordinate conversion between genome assemblies. *Bioinformatics*. 2014;30:1006–7.
3. Broad Institute. Picard tools. {Broad Institute, GitHub repository}.
4. Chain Format. <https://genome.ucsc.edu/goldenPath/help/chain.html>. Accessed 23 Feb 2022.
5. Danecek P, Auton A, Abecasis G, Albers CA, Banks E, DePristo MA, et al. The variant call format and VCFtools. *Bioinformatics*. 2011;27:2156–8.
6. Ormond C, Ryan NM, Corvin A, Heron EA. Converting single nucleotide variants between genome builds: from cautionary tale to solution. *Brief Bioinform*. 2021. <https://doi.org/10.1093/bib/bbab069>.
7. Lan D. The variant call format - Dual Coordinate extension (DVCF) specification. *figshare*; 2021.
8. Lan D, Tobler R, Souilmi Y, Llamas B. Genozip - A Universal Extensible Genomic Data Compressor. *Bioinformatics*. 2021. <https://doi.org/10.1093/bioinformatics/btab102>.
9. Lan D, Tobler R, Souilmi Y, Llamas B. genozip: a fast and efficient compression tool for VCF files. *Bioinformatics*. 2020;36:4091–2.
10. Landrum MJ, Lee JM, Benson M, Brown G, Chao C, Chitipiralla S, et al. ClinVar: public archive of interpretations of clinically relevant variants. *Nucleic Acids Res*. 2015;44:D862–8.

## Acknowledgements

D.L. was supported by a scholarship from the University of Adelaide. Y.S. is supported by the Australian Research Council (DP190103705). R.T. is an ARC DECRA fellow (DE190101069). B.L. was an ARC Future Fellow (FT170100448).

*Conflict of Interest:* D.L. intends to receive royalties from commercial users of genozip.

---

### **Contributions**

DL wrote the software and the first draft of the manuscript. BL, RT and YS reviewed and edited the manuscript and provided guidance. GP provided feedback that helped improve the software.

### **Corresponding author**

Correspondence to Divon Lan ([divon@genozip.com](mailto:divon@genozip.com)) and Bastien Llamas ([bastien.llamas@adelaide.edu.au](mailto:bastien.llamas@adelaide.edu.au)).

### **Supplementary Information**

Supplementary Information

Supplementary text

Supplementary Figs. S1-S4

Supplementary Tables S1-S20
